# Supplementary material
Source: PubMed Central journal article supplement (PMC380970)
Supplement: 7600109s1.pdf [file 7600109s1.pdf]

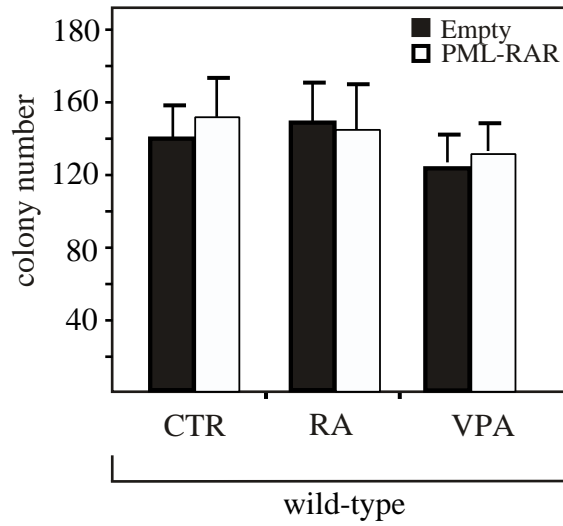

### Supplementary Fig. 1

#### Effect of RA and VPA on the colony number of lin- cells.

Lin- cells were prepared from wild-type mice, and infected with a PML-RAR vector or with the empty control vector, as indicated. Sorted cells underwent cytokine deprivation in the absence (CTR) or presence of RA (1 $\mu$ M) or VPA (1mM). Cells were then plated in methylcellulose medium, and colonies were counted after 8 days.
