# Supplementary material
Source: PubMed Central journal article supplement (PMC380970)
Supplement: 7600109s2.pdf [file 7600109s2.pdf]

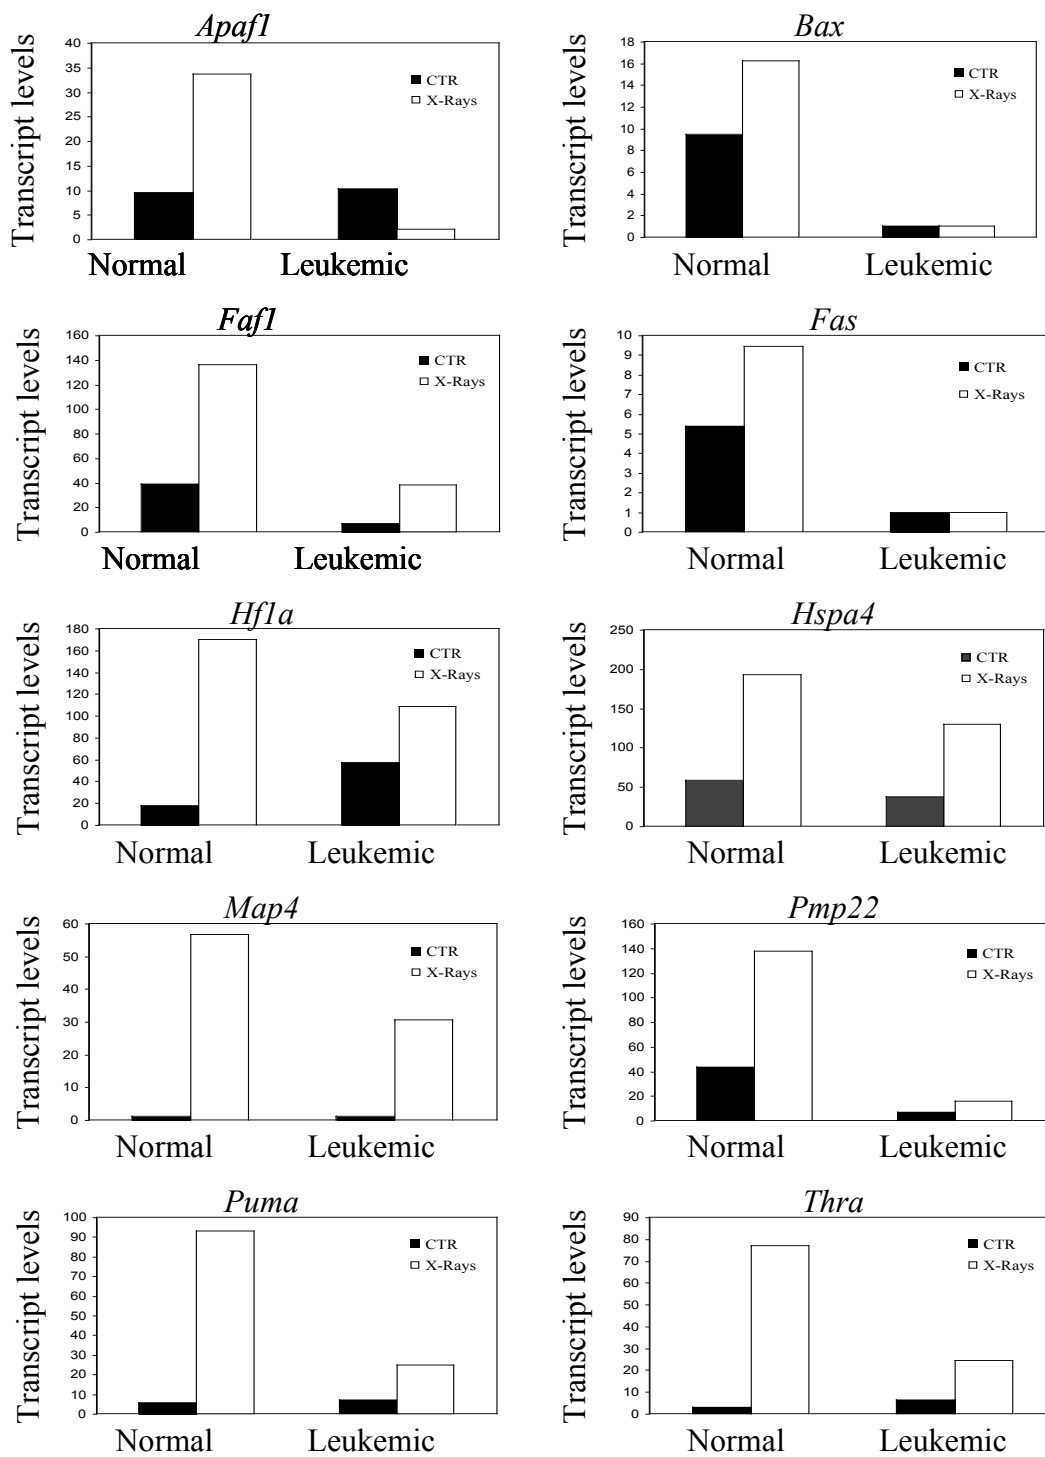

**Supplementary Fig.2.**

**Inhibition of p53-dependent transcriptional response upon stress in APL blasts.**

Analysis of a “p53 pathway” Superarray filter was performed on RNA samples derived from normal and APL mice, prior/after X-ray treatment in vivo; the graphs shows (for the genes listed in Fig. 2) the normalized transcript levels.
