# Supplementary material
Source: PubMed Central journal article supplement (PMC380970)
Supplement: 7600109s3.pdf [file 7600109s3.pdf]

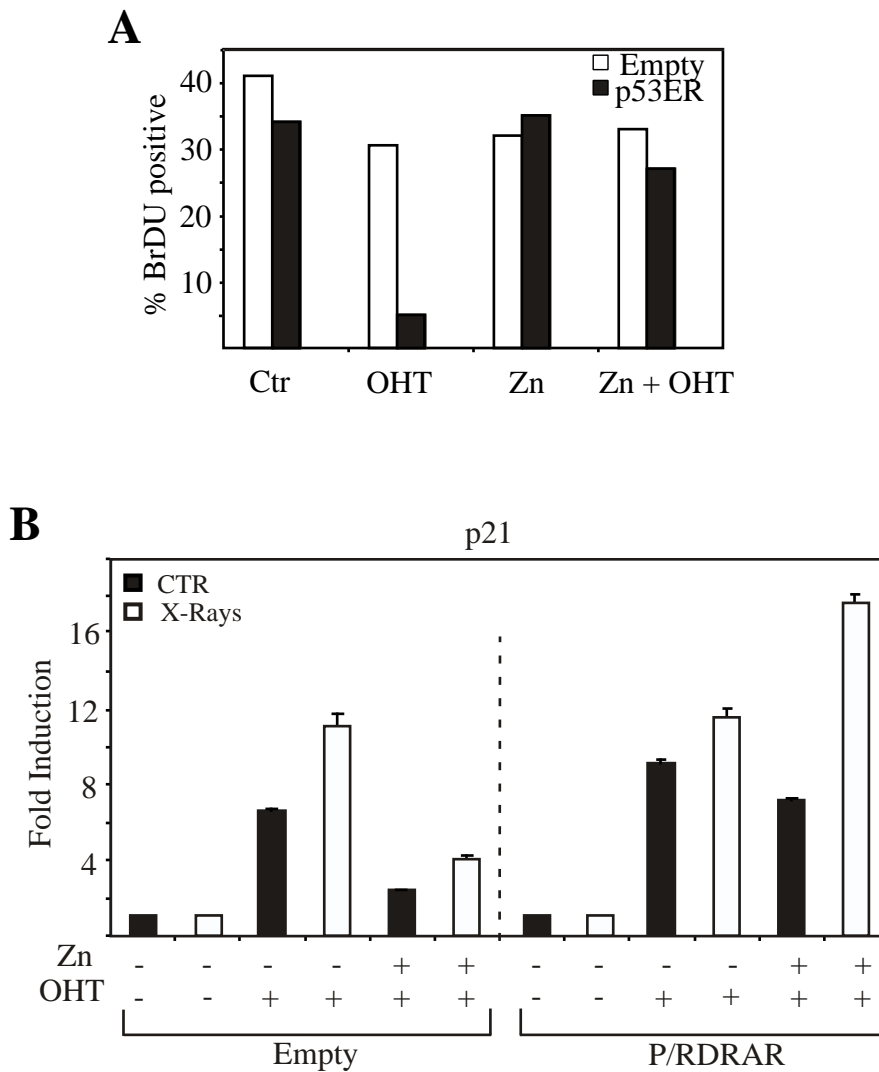

**Supplementary Fig. 3**

**Establishment of a model system to study the effect of PML-RAR on p53 functions in U937 cells.**

(A) Analysis of bromo-deoxyuridine incorporation of U937-PR9 cells transduced with the empty vector, or the p53ER vector. Zn was used to induce PML-RAR expression, OHT to activate p53ER. (B) Q-PCR analysis of p21 induction in PR9-p53ER cells. Cells were infected with the empty vector or with a P/RDRAR vector, treated with OHT and zinc, and then left untreated (CTR) or X-ray irradiated.
