# Supplementary material
Source: PubMed Central journal article supplement (PMC380970)
Supplement: 7600109s5.pdf [file 7600109s5.pdf]

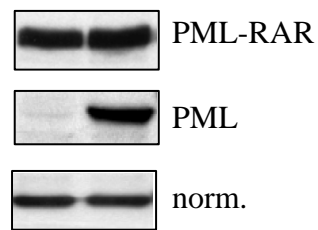

### Supplementary Fig. 5

#### **PML cotransfection does not affect PML-RAR levels in Phoenix cells.**

Phoenix cells were transfected with a PML-RAR expression vector in the presence or absence of a PML expressing vector. Immunoblotting was performed using antibodies against PML.
